# Supplementary material for: Study on the Enhanced Shelf Lifetime of CYTOP-Encapsulated Organic Solar Cells
Source: MDPI journal article supplement (doi:10.3390/en14133993), 2021-07-02
Supplement: s1 [file s1]

# Study on the Enhanced Shelf Lifetime of CYTOP-Encapsulated Organic Solar Cells: Supplementary Material

Jaehoon Kim <sup>1</sup>, Hyung-Jun Song <sup>2,\*</sup> and Changhee Lee <sup>1,\*</sup>

<sup>1</sup> Department of Electrical and Computer Engineering, Seoul National University, Seoul 08826, Republic of Korea; jplane@snu.ac.kr (J.K.); chlee7@snu.ac.kr (C.L.)

<sup>2</sup> Department of Safety Engineering, Seoul National University of Science and Technology, Seoul, 01811, Republic of Korea; hj.song@seoultech.ac.kr (H.-J.S.)

\* Correspondence: hj.song@seoultech.ac.kr (H.-J.S.); chlee7@snu.ac.kr (C.L.)

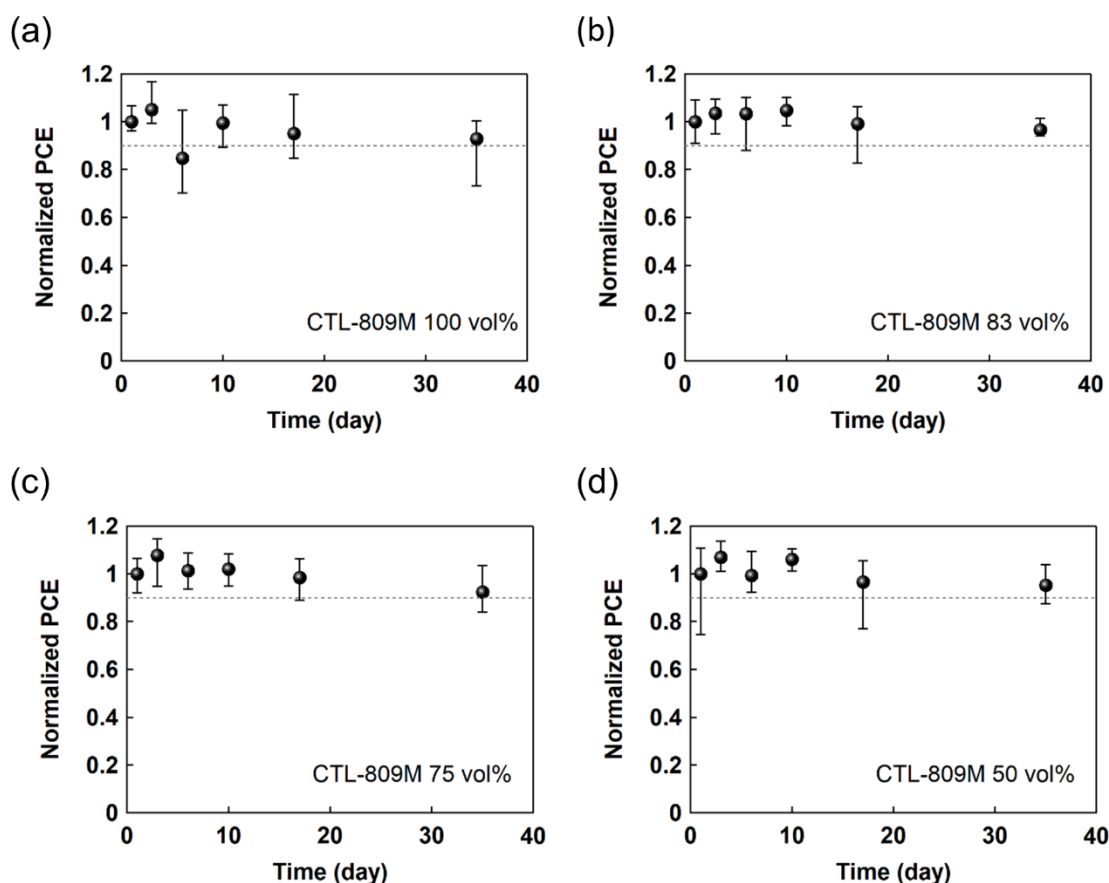

**Figure S1.** Normalized power conversion efficiency (PCE) of organic solar cells (OSCs) as a function of aging time depending on the CYTOP (CTL809M) volume concentration, where the gray dotted line indicates the points with a value of 0.9.
